# Supplementary material for: Development and Validation of Indirect Enzyme-Linked Immunosorbent Assays for Detecting Antibodies to SARS-CoV-2 in Cattle, Swine, and Chicken
Source: MDPI journal article supplement (doi:10.3390/v14071358), 2022-06-22
Supplement: s1 [file s1]

## Article

# Development and Validation of Indirect Enzyme-Linked Immunosorbent Assays for Detecting Antibodies to SARS-CoV-2 in Cattle, Swine, and Chicken

Abhinay Gontu <sup>1,2</sup>, Erika A. Marlin <sup>1,3</sup>, Santhamani Ramasamy <sup>1</sup>, Sabarinath Neerukonda <sup>4</sup>, Gayatri Anil <sup>1</sup>, Jasmine Morgan <sup>1</sup>, Meysoon Quraishi <sup>1</sup>, Chen Chen <sup>5</sup>, Veda Sheersh Boorla <sup>5</sup>, Ruth H. Nissly <sup>2</sup>, Padmaja Jakka <sup>1,2</sup>, Shubhada K. Chothe <sup>1</sup>, Abirami Ravichandran <sup>6</sup>, Nishitha Kodali <sup>1,7</sup>, Saranya Amirthalingam <sup>1,7</sup>, Lindsey LaBella <sup>1</sup>, Kathleen Kelly <sup>2</sup>, Pazhanivel Natesan <sup>8</sup>, Allen M. Minns <sup>7,9</sup>, Randall M. Rossi <sup>7</sup>, Jacob R. Werner <sup>10</sup>, Ernest Hovingh <sup>1</sup>, Scott E. Lindner <sup>7,9</sup>, Deepanker Tewari <sup>11</sup>, Vivek Kapur <sup>7,10,12</sup>, Kurt J. Vandegrift <sup>7,12,13</sup>, Costas D. Maranas <sup>5</sup>, Meera Surendran Nair <sup>1,2,\*</sup> and Suresh V. Kuchipudi <sup>1,2,7,12,\*</sup>

- <sup>1</sup> Department of Veterinary and Biomedical Sciences, The Pennsylvania State University, University Park, PA 16802, USA; abhinay@psu.edu (A.G.); erika.marlin@pfizer.com (E.A.M.); sqr5895@psu.edu (S.R.); gxa5148@psu.edu (G.A.); jkm5870@psu.edu (J.M.); mj5073@psu.edu (M.Q.); padmaja@psu.edu (P.J.); skc172@psu.edu (S.K.C.); nkk5370@psu.edu (N.K.); ska5899@psu.edu (S.A.); lcl122@psu.edu (L.L.); eph1@psu.edu (E.H.)
- <sup>2</sup> Animal Diagnostic Laboratory, Department of Veterinary and Biomedical Sciences, The Pennsylvania State University, University Park, PA 16802, USA; rah38@psu.edu (R.H.N.); kmk6898@psu.edu (K.K.)
- <sup>3</sup> Clinical & Diagnostic Assay Development Group, Pfizer, Pearl River, NY 10965, USA
- <sup>4</sup> U.S. Department of Health and Human Services, Silver Spring, MD 20993, USA; nnvsnath@gmail.com
- <sup>5</sup> Department of Chemical Engineering, The Pennsylvania State University, University Park, PA 16802, USA; czc325@psu.edu (C.C.); vqb5186@psu.edu (V.S.B.); cdm8@psu.edu (C.D.M.)
- <sup>6</sup> Department of Integrative and Biomedical Physiology, The Pennsylvania State University, University Park, PA 16802, USA; aur1121@psu.edu
- <sup>7</sup> Huck Institute of Life Sciences, The Pennsylvania State University, University Park, PA 16802, USA; amm504@psu.edu (A.M.M.); rmr29@psu.edu (R.M.R.); sel27@psu.edu (S.E.L.); vxk1@psu.edu (V.K.); kjv1@psu.edu (K.J.V.)
- <sup>8</sup> Madras Veterinary College, Tamil Nadu Veterinary and Animal Sciences University, Chennai 600007, India; drnpvel@gmail.com
- <sup>9</sup> Department of Biochemistry and Molecular Biology, The Pennsylvania State University, University Park, PA 16802, USA
- <sup>10</sup> Department of Animal Science, The Pennsylvania State University, University Park, PA 16802, USA; jrw140@psu.edu
- <sup>11</sup> Pennsylvania Department of Agriculture, Pennsylvania Veterinary Laboratory, Harrisburg, PA 17110, USA; dtewari@pa.gov
- <sup>12</sup> Center for Infectious Disease Dynamics, The Pennsylvania State University, University Park, PA 16802, USA
- <sup>13</sup> Department of Biology, The Pennsylvania State University, University Park, PA 16802, USA
- \* Correspondence: mms7306@psu.edu (M.S.N.); skuchipudi@psu.edu (S.V.K.)

## SARS-CoV-2 Spike Pseudovirus Production and Neutralization Assay

SARS-CoV-2 pseudo viruses were produced as described previously by Crawford et al [55,56]. Plasmids encoding spike proteins of SARS-CoV-2 Wuhan strain and Alpha, Beta, Gamma, Delta, and Omicron VOCs were co-transfected with lentiviral backbone plasmid expressing firefly luciferase and lentiviral helper plasmids expressing HIV Gag-pol, Tat and Rev. 293T cells were transfected with the plasmids using jetPRIME® transfection reagent (Polyplus®). Supernatants containing pseudo-typed particles were collected at 48 hr post-transfection and filtered with a 0.45 µm filter. For neutralization assays, HIS produced against RBD in cattle, swine and chicken was 3-fold serially diluted prior to incubation with pseudo viruses for one hr at 37°C. Pseudovirus/HIS mixtures were then added to 96-wells pre-seeded with 293T-hACE2/TMPRSS2 cells (NR-55293, BEI resources). Luciferase activity was measured at 48hr post infection to quantify the neutralization titer of tested sera.

**Table S1.** Characteristics of species-specific iELISAs developed for detecting antibodies against SARS-CoV-2.

| Characteristic     | Value (95% Confidence Interval) |
|--------------------|---------------------------------|
| <b>Cattle</b>      |                                 |
| <b>Sensitivity</b> | 100.00% (75.29% to 100.00%)     |
| <b>Specificity</b> | 100.00% (97.57% to 100.00%)     |
| <b>Accuracy</b>    | 100.00% (97.76% to 100.00%)     |
| <b>Swine</b>       |                                 |
| <b>Sensitivity</b> | 100.00% (54.07% to 100.00%)     |
| <b>Specificity</b> | 100.00% (97.57% to 100.00%)     |
| <b>Accuracy</b>    | 100.00% (97.66% to 100.00%)     |
| <b>Chicken</b>     |                                 |
| <b>Sensitivity</b> | 100.00% (85.75% to 100.00%)     |
| <b>Specificity</b> | 100.00% (97.57% to 100.00%)     |
| <b>Accuracy</b>    | 100.00% (97.90% to 100.00%)     |

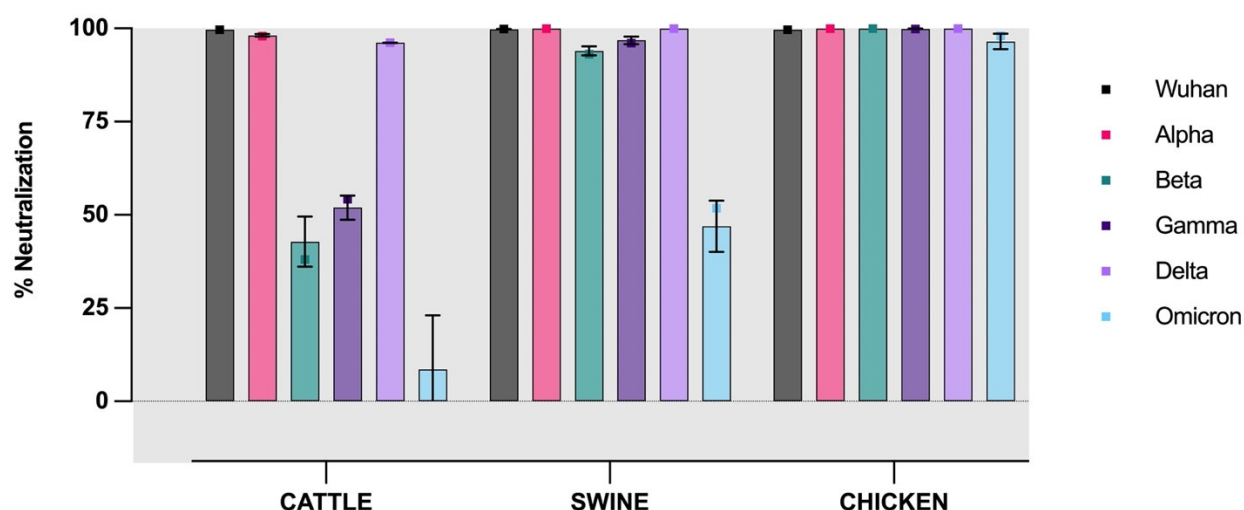

**Figure S1.** Hyperimmune serum raised with Wuhan RBD cross reacts with SARS-CoV-2 VOCs. Cattle, swine, and chicken hyperimmune sera raised against SARS-CoV-2 RBD were tested for the ability to neutralize SARS-CoV-2 pseudoviruses expressing spike protein of Wuhan and Alpha, Beta, Gamma, Delta and Omicron VOCs. The hyperimmune serum from all three species broadly cross-neutralized all the tested SARS-CoV-2 VOCs. Height of bar represents the percent (%) neutralization. Error bars represent the standard deviation.
